# Supplementary material
Source: Royal Society of Chemistry journal article supplement (doi:10.1039/d5nj04712a)
Supplement: d5nj04712a1.pdf [file d5nj04712a1.pdf]

## Influence of Temperature and Additives (Glucose/Urea) on the Antidiabetic Drug-Mediated Micellization of CTAB

Abhishek Srivastava<sup>a\*</sup>, Pintu Sar<sup>b\*\*</sup>, Manoj Kumar Banjare<sup>c</sup>, Nitin Srivastava<sup>d</sup>, Neetu Srivastava<sup>e</sup>

<sup>a</sup>Department of Chemistry, GLA University, Mathura- 281406, U.P., India

<sup>b</sup>Department of Chemistry, Bhagalpur National College (Tilka Manjhi Bhagalpur University), Bhagalpur-812007, Bihar, India

<sup>c</sup>Department of Chemistry, State Forensic Science Laboratory (SFSL), Raipur, Chhattisgarh 492001, India

<sup>d</sup>Department of Chemistry, Amity University Lucknow, Lucknow-226028, U.P., India

<sup>e</sup>Department of Chemistry, D.D.U. Gorakhpur University, Gorakhpur, U.P., India

Corresponding author email: [\\*aabhichem@gla.ac.in](mailto:*aabhichem@gla.ac.in); [\\*\\*pintusar1@gmail.com](mailto:**pintusar1@gmail.com)

### Supporting information

**Table S1.** Effect of [MHC] on the CMC and  $\alpha$  of the CTAB in different solvent media at 298 K

| [MHC], mM | Water   |          | Glucose (10 mM) |          | Urea (300 mM) |          |
|-----------|---------|----------|-----------------|----------|---------------|----------|
|           | CMC, mM | $\alpha$ | CMC, mM         | $\alpha$ | CMC, mM       | $\alpha$ |
| 0.0       | 0.91    | 0.31     | 0.94            | 0.34     | 0.99          | 0.36     |
| 0.5       | 0.82    | 0.30     | 0.86            | 0.33     | 0.9           | 0.35     |
| 1.0       | 0.76    | 0.30     | 0.81            | 0.31     | 0.87          | 0.34     |
| 2.0       | 0.66    | 0.28     | 0.74            | 0.29     | 0.77          | 0.34     |
| 3.5       | 0.57    | 0.27     | 0.62            | 0.29     | 0.68          | 0.32     |
| 5.0       | 0.52    | 0.26     | 0.58            | 0.28     | 0.62          | 0.30     |

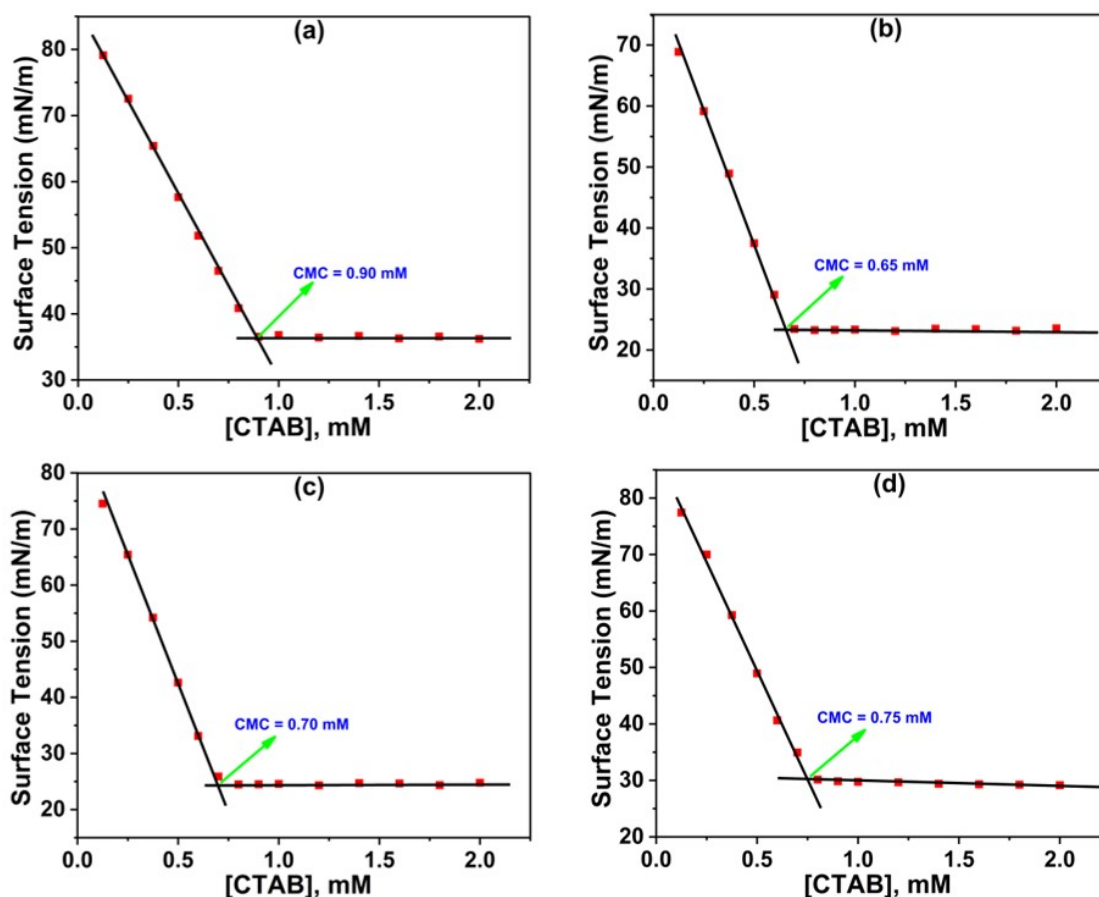

**Fig. S1.** Plots of surface tension versus [CTAB] at 298 K (a) Pure CTAB; (b) CTAB – MHC; (c) CTAB–MHC system in 10 mM glucose; (d) CTAB–MHC system in 300 mM urea. Keeping [MHC] = 2.0 mM for all the [surfactant-drug] mixed system

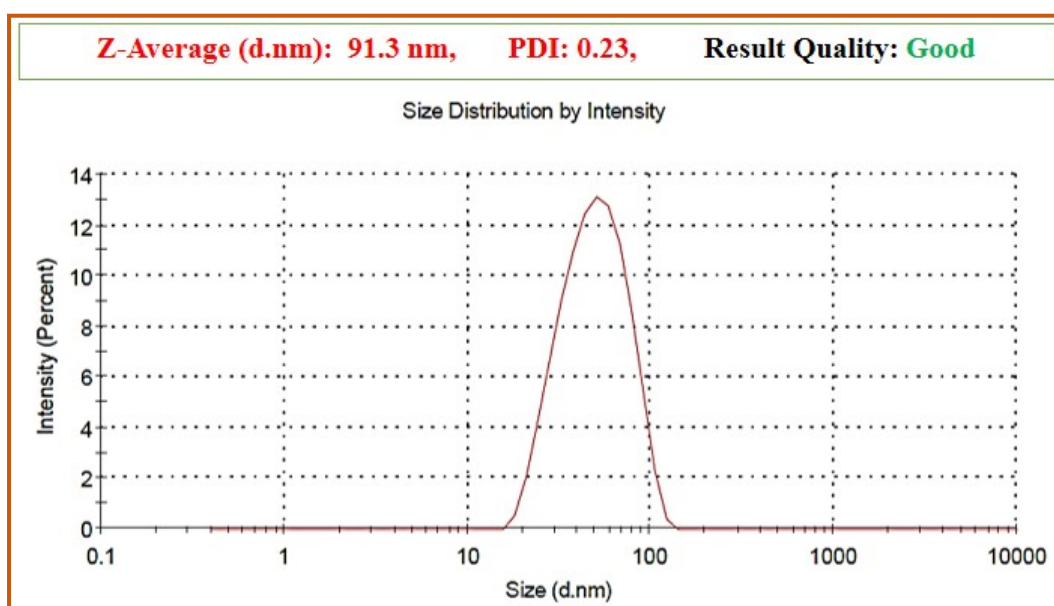

**Fig. S2.** The size (d) of micellar nanoaggregates, as determined by DLS technique, of CTAB-MHC mixed system; [CTAB] = 1.2 mM and [MHC] = 5.0 mM.

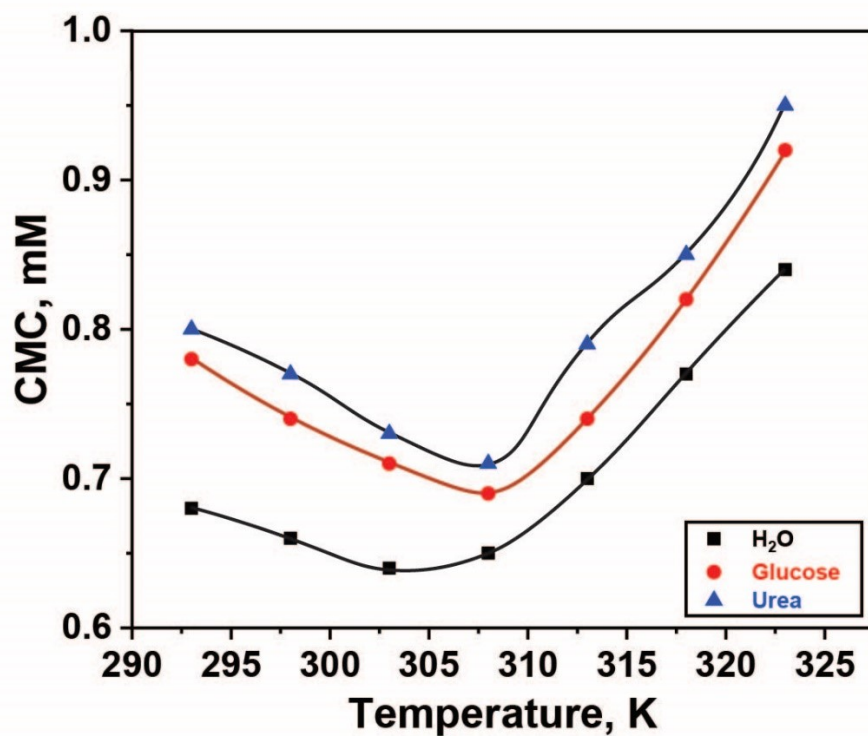

**Fig. S3.** Influence of temperature on the CMC of CTAB–MHC system in aqueous, glucose (10 mM), and urea (300 mM) media

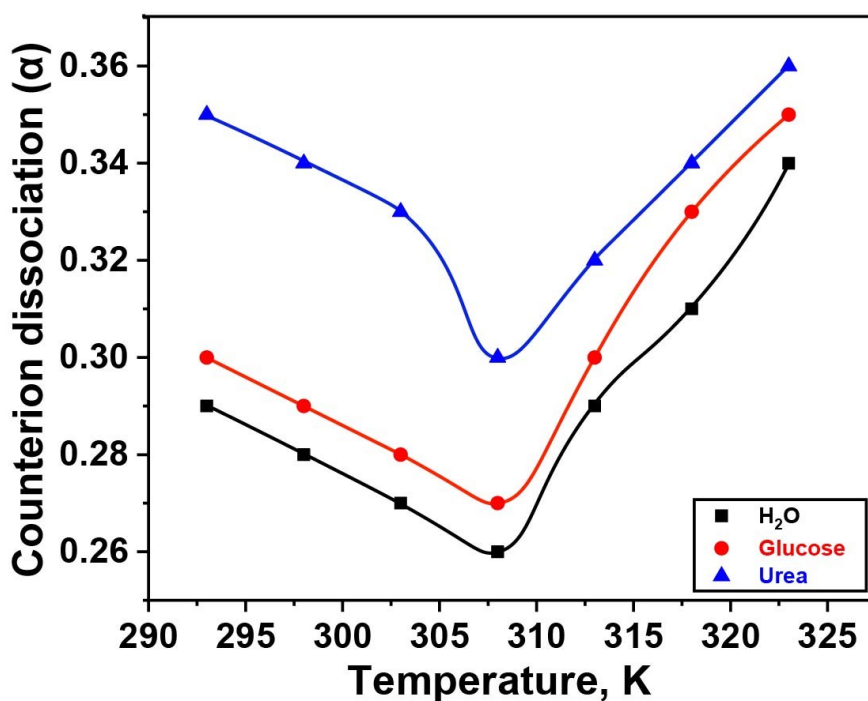

**Fig. S4.** Influence of temperature on the counterion dissociation of CTAB–MHC system in aqueous, glucose (10 mM), and urea (300 mM) media
